# Supplementary material for: Selective replication and vertical transmission of Ebola virus in experimentally infected Angolan free-tailed bats
Source: PubMed Central journal article supplement (PMC10830451; doi:10.1038/s41467-024-45231-0), 2024-01-31
Supplement: 41467_2024_45231_MOESM3_ESM.pdf [file 41467_2024_45231_MOESM3_ESM.pdf]

## **Description of additional Supplementary Information**

File name: Supplementary Data 1

Description: Keys to identify Angolan free-tailed bats in Côte d'Ivoire and individual results of sequenced cyt b fragment of experimental bats

File name: Supplementary Data 2

Description: Macroscopic pathology findings score (0 to 2) during necropsy linked to IHC staining (score 0-3) in all cohorts

File name: Supplementary Data 3

Description: Individual animal parameters and histopathologic report for all cohorts linked to (partial) IHC results

File name: Supplementary Data 4

Description: Immunohistochemical findings
